# Supplementary material for: Oxygen delignification of conventional and high alkali cooked softwood Kraft pulps, and study of the residual lignin structure
Source: Royal Society of Chemistry journal article supplement (doi:10.1039/c4ra00115j), 2014-01-01
Supplement: c4ra00115j1.pdf [file c4ra00115j1.pdf]

## Supporting information

# Oxygen delignification of conventional and high alkali cooked softwood kraft pulps, and study of the residual lignin structure

Vahid Jafari<sup>\*1</sup>, Sara R. Labafzadeh<sup>3</sup>, Alistair King<sup>3</sup>, Ilkka Kilpeläinen<sup>3</sup>, Herbert Sixta<sup>1</sup> and Adriaan van Heiningen<sup>1,2</sup>

<sup>1</sup> Department of Forest Products Technology, Aalto University, FI-00076 AALTO, Finland

<sup>2</sup> Department of Chemical and Biological Engineering, University of Maine, 5737 Jenness Hall, Orono, ME 04469-5737 USA

<sup>3</sup> Laboratory of Organic Chemistry, Department of Chemistry, University of Helsinki, P.O.Box 55, FIN-00014, Helsinki

Corresponding author: e-mail: [Herbert.sixta@aalto.fi](mailto:Herbert.sixta@aalto.fi)

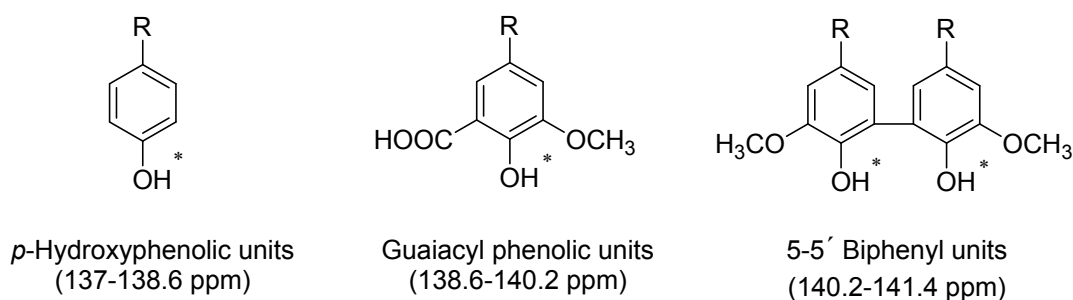

**Figure 1.** Typical phenolics present in the lignin samples in this study and the corresponding chemical shifts in their <sup>31</sup>P NMR spectra.

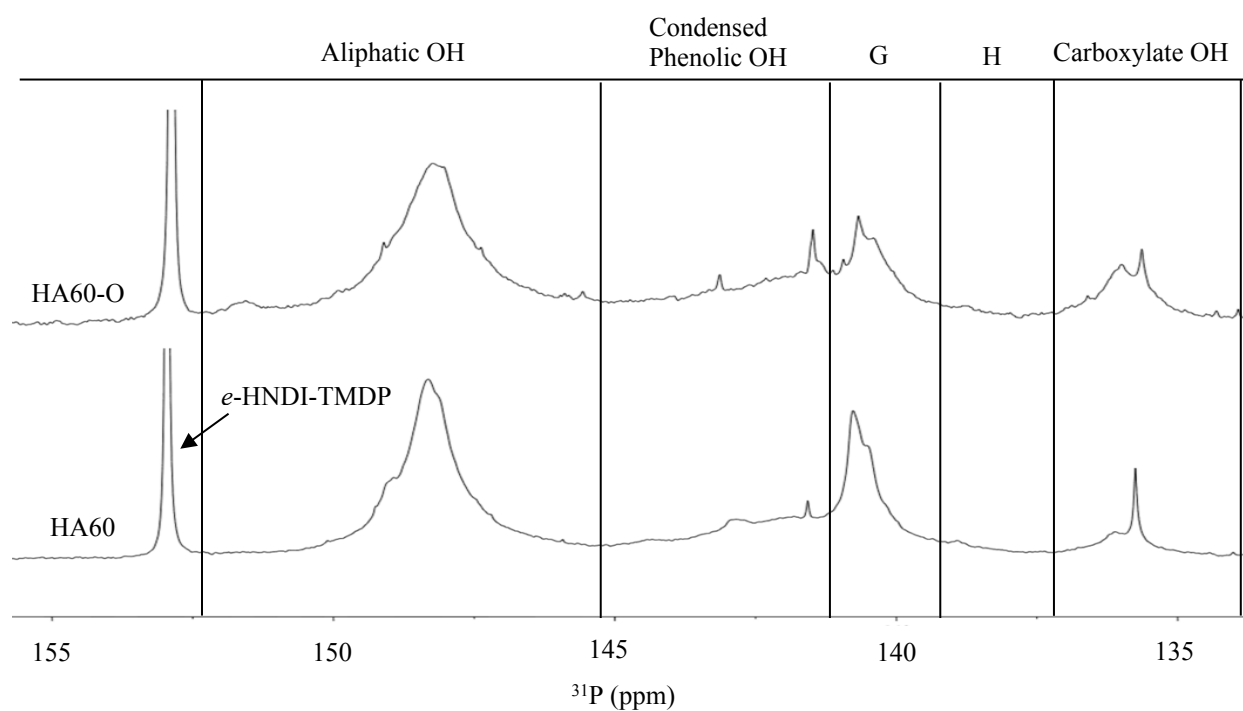

Fi

**Figure 2.**  $^{31}\text{P}$  NMR spectra of HA60 and HA60-OD (G: Guaiacyl phenolic OH, H: *p*-Hydroxyphenolic OH).

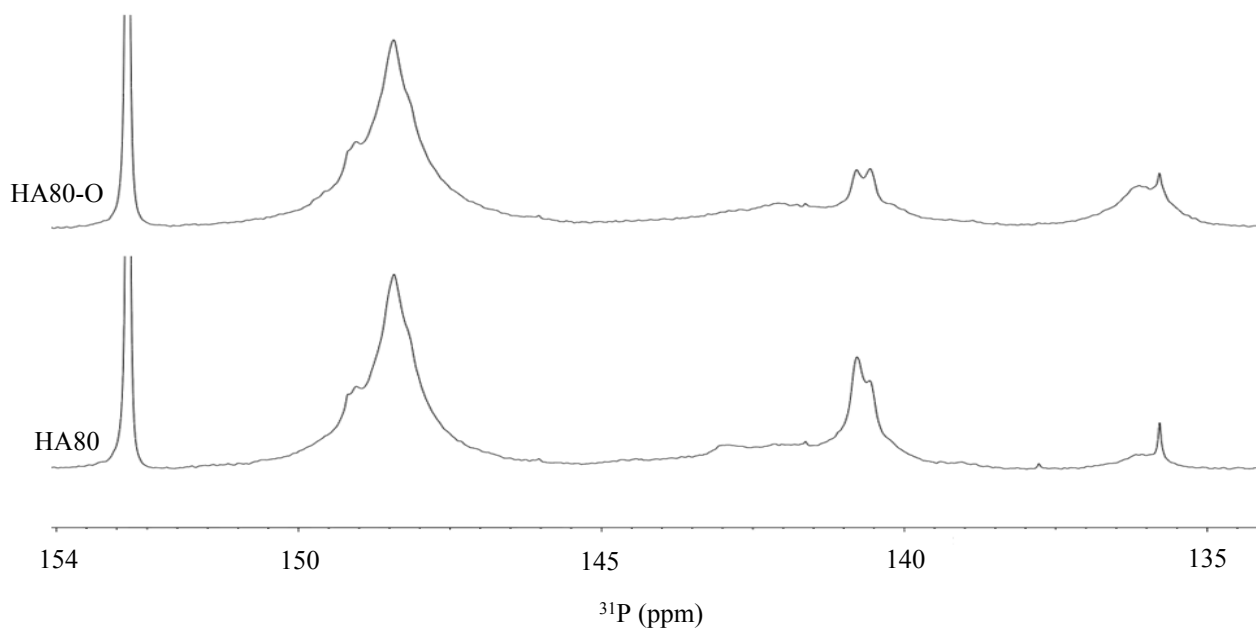

**Figure 3.**  $^{31}\text{P}$  NMR spectra of HA80 and HA80-OD (G: Guaiacyl phenolic OH, H: *p*-Hydroxyphenolic OH).

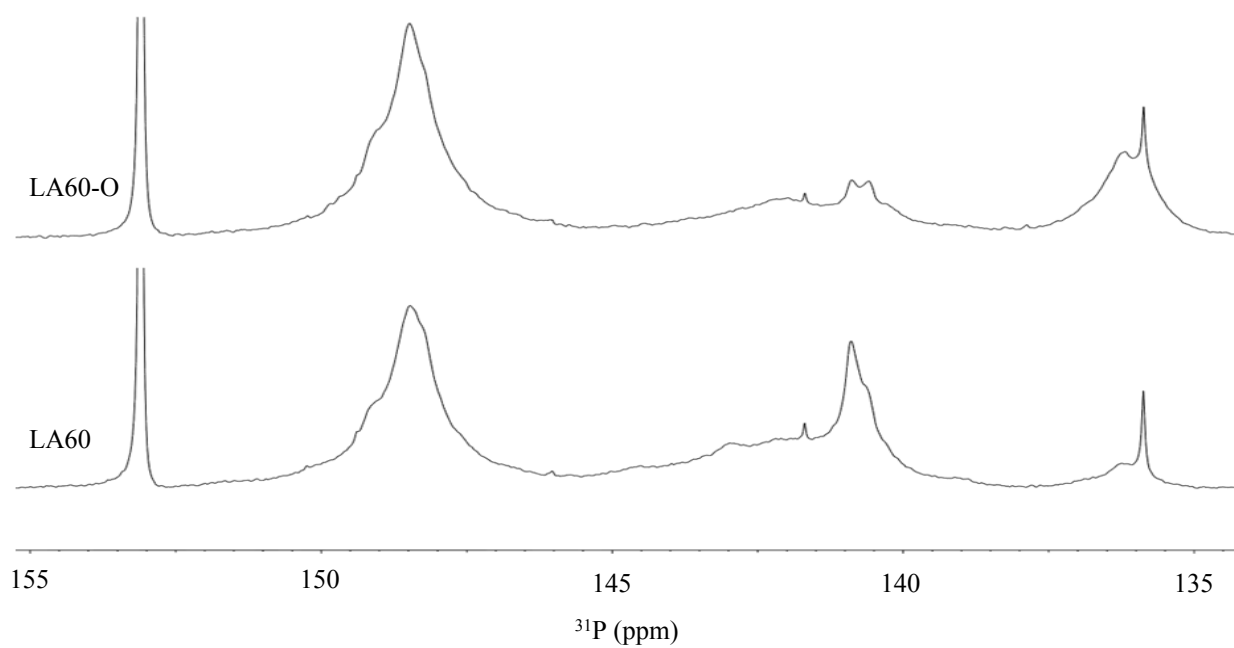

**Figure 4.**  $^{31}\text{P}$  NMR spectra of LA60 and LA60-OD (G: Guaiacyl phenolic OH, H: *p*-Hydroxyphenolic OH).

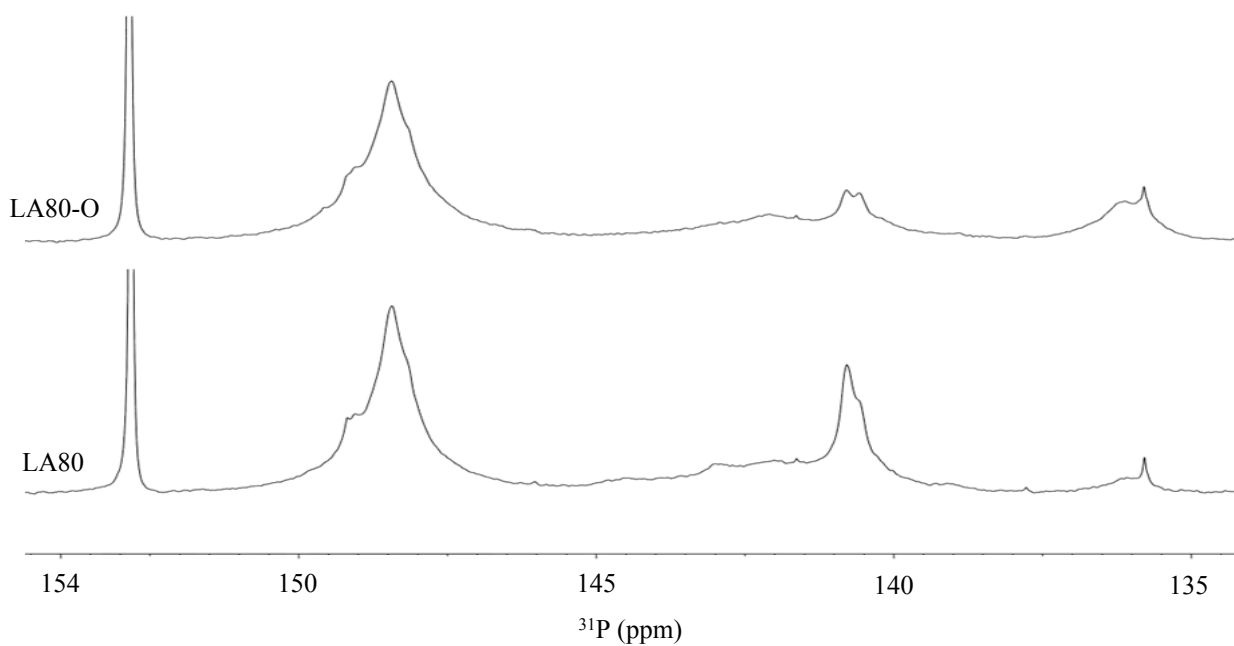

**figure 5.**  $^{31}\text{P}$  NMR spectra of HA80 and HA80-OD (G: Guaiacyl phenolic OH, H: *p*-Hydroxyphenolic OH).

**Table 1.**  $^{31}\text{P}$  NMR chemical shifts of typical hydroxyl groups within residual Kraft lignin[1]

| Reactive groups             | $^{31}\text{P}$ (ppm) |
|-----------------------------|-----------------------|
| Carboxyl OH                 | 133-137               |
| p-Hydroxy-phenolic OH       | 137-138.6             |
| Guaiacyl OH                 | 138-140.2             |
| Total condensed phenolic OH | 140.2-145.2           |
| 5-5' Condensed OH           | 140.2-141.4           |
| Aliphatic OH                | 145.2-151.4           |

**Table 2.** Integral values of typical hydroxyl groups within residual Kraft lignin in  $^{31}\text{P}$  NMR spectra

| <i>Lignin sample</i> | <i>Carboxyl OH</i> | <i>p-Hydroxy-phenolic OH</i> | <i>Guaiacyl OH</i> | <i>Total condensed phenolic OH</i> | <i>5-5' Condensed OH</i> | <i>Aliphatic OH</i> |
|----------------------|--------------------|------------------------------|--------------------|------------------------------------|--------------------------|---------------------|
| HA60                 | 37.24              | 18.11                        | 57.03              | 58.13                              | 29.49                    | 75.09               |
| HA60-O               | 46.95              | 20.49                        | 45.2               | 58.54                              | 38.36                    | 74.02               |
| LA60                 | 32.12              | 14.53                        | 54.51              | 59.96                              | 28.07                    | 74.77               |
| LA60-O               | 55.05              | 18.5                         | 38.15              | 50.68                              | 29.82                    | 75.37               |
| HA80                 | 30.75              | 14.27                        | 51.6               | 51.2                               | 24.7                     | 75.99               |
| HA80-O               | 45.4               | 16.27                        | 39.75              | 49.22                              | 28.37                    | 76.1                |
| LA80                 | 27.56              | 14.32                        | 53.27              | 55.66                              | 32.46                    | 75.2                |
| LA80-O               | 45.93              | 12.42                        | 40.1               | 47.75                              | 31.15                    | 74.96               |

Integral values are measured against the phosphitylated internal standard.

#### References:

1. Jiang, Z., D.S. Argyropoulos, and A. Granata, *Correlation analysis of  $^{31}\text{P}$  NMR chemical shifts with substituent effects of phenols*. Magnetic Resonance in Chemistry, 1995. **33**(5): p. 375-382.
